# Supplementary material
Source: PubMed Central journal article supplement (PMC4346553)
Supplement: NIHMS622702-supplement-2.pdf [file NIHMS622702-supplement-2.pdf]

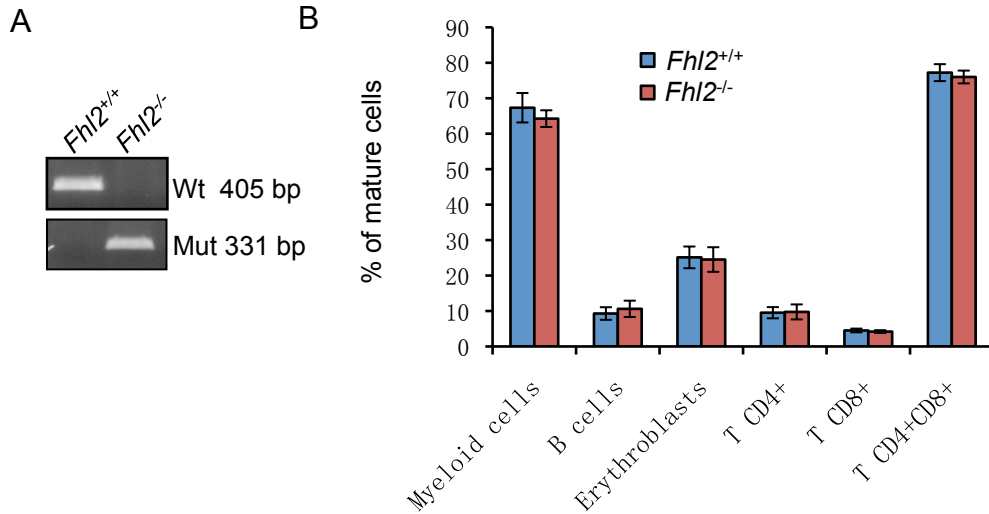

**Supplementary Figure 1. The young *Fhl2*-deficient mice displayed a normal distribution of mature hematopoietic cells.** (A) PCR analysis of genomic DNA isolated from *Fhl2*-deficient and control wildtype mice. (B) The frequency of myeloid cells (Mac-1<sup>+</sup>Gr-1<sup>+</sup>), mature B cells (B220<sup>+</sup>), erythroblast cells (CD71<sup>+</sup>Ter119<sup>+</sup>) in BM and various types of T cells in Thymus from *Fhl2*-deficient and control mice (n=5) at age of 2 months.

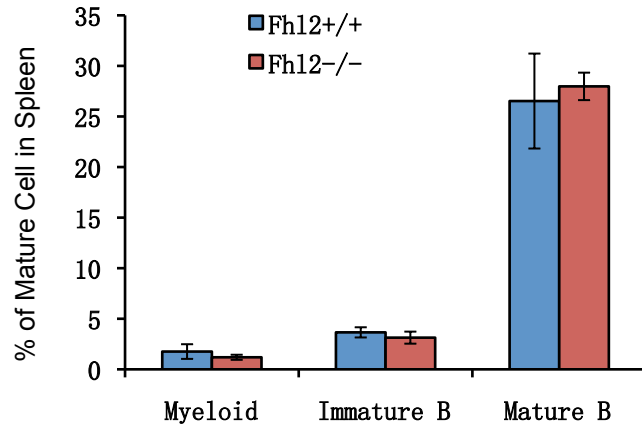

**Supplementary Figure 2. Flow cytometric analysis of blood cells in spleen.** The frequency of myeloid cells (Mac-1+Gr-1+), immature B cells (B220+IgM-) and mature B cells (B220+IgM+) in spleen were determined from primary *Fh12*<sup>+/+</sup> and *Fh12*<sup>-/-</sup> mice at age of 2-3 months (n=3-4).

| Table1. Blood Cell counts in 9-Week-Old <i>Fhl2</i> <sup>+/+</sup> and <i>Fhl2</i> <sup>-/-</sup> Mice |                            |                            |         |
|--------------------------------------------------------------------------------------------------------|----------------------------|----------------------------|---------|
|                                                                                                        | <i>Fhl2</i> <sup>+/+</sup> | <i>Fhl2</i> <sup>-/-</sup> | P Value |
| WBC(K/ $\mu$ L)                                                                                        | 13.99 $\pm$ 2.97           | 15.03 $\pm$ 4.00           | NS      |
| NE(K/ $\mu$ L)                                                                                         | 3.22 $\pm$ 0.57            | 3.24 $\pm$ 0.97            | NS      |
| LY(K/ $\mu$ L)                                                                                         | 9.62 $\pm$ 2.42            | 10.71 $\pm$ 2.76           | NS      |
| MO(K/ $\mu$ L)                                                                                         | 0.86 $\pm$ 0.2             | 0.85 $\pm$ 0.35            | NS      |
| EO(K/ $\mu$ L)                                                                                         | 0.21 $\pm$ 0.18            | 0.17 $\pm$ 0.25            | NS      |
| BA(K/ $\mu$ L)                                                                                         | 0.08 $\pm$ 0.08            | 0.07 $\pm$ 0.11            | NS      |
| RBC(M/ $\mu$ L)                                                                                        | 9.93 $\pm$ 1.74            | 10.45 $\pm$ 0.54           | NS      |
| Hb(g/dL)                                                                                               | 12.90 $\pm$ 2.19           | 13.85 $\pm$ 1.24           | NS      |
| HCT(%)                                                                                                 | 42.88 $\pm$ 7.47           | 44.38 $\pm$ 3.23           | NS      |
| MCV(fL)                                                                                                | 43.20 $\pm$ 1.02           | 42.45 $\pm$ 1.52           | NS      |
| MCH(pg)                                                                                                | 13.03 $\pm$ 0.22           | 13.25 $\pm$ 0.54           | NS      |
| PLT(K/ $\mu$ L)                                                                                        | 924.00 $\pm$ 381           | 1071.25 $\pm$ 259          | NS      |

Values shown are the mean  $\pm$  SD for 5 mice per genotype. WBC, white blood cell; NE, neutrophils; LY, lymphocytes; MO, monocytes; EO, eosinophils; BA, basophils; RBC, red blood cell; Hb, hemoglobin; HCT, hematocrit; MCV, mean corpuscular volume; MCH, mean corpuscular hemoglobin; PLT, platelet; NS, not significant.

**Supplementary Table1. Young *Fhl2*-deficient mice displayed normal hematological parameters.** Complete Blood Count (CBC) analysis of Peripheral Blood (PB) from 9-week-old *Fhl2*<sup>+/+</sup> and *Fhl2*<sup>-/-</sup> mice (n=5).

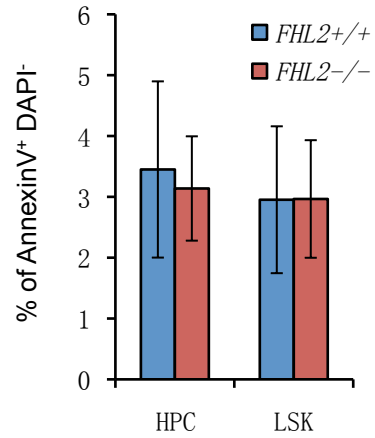

**Supplementary Figure 3. Comparable frequency of apoptosis in LSKs and HPCs.** The histograms depicting mean frequency of early apoptotic cells (AnnexinV<sup>+</sup> DAPI<sup>-</sup>) in HPCs and LSKs in BM from primary *Fhl2*<sup>+/+</sup> and *Fhl2*<sup>-/-</sup> mice (n=5) at age of 2 months. LSKs are defined as Lin-Sca-1<sup>+</sup>c-Kit<sup>+</sup>.

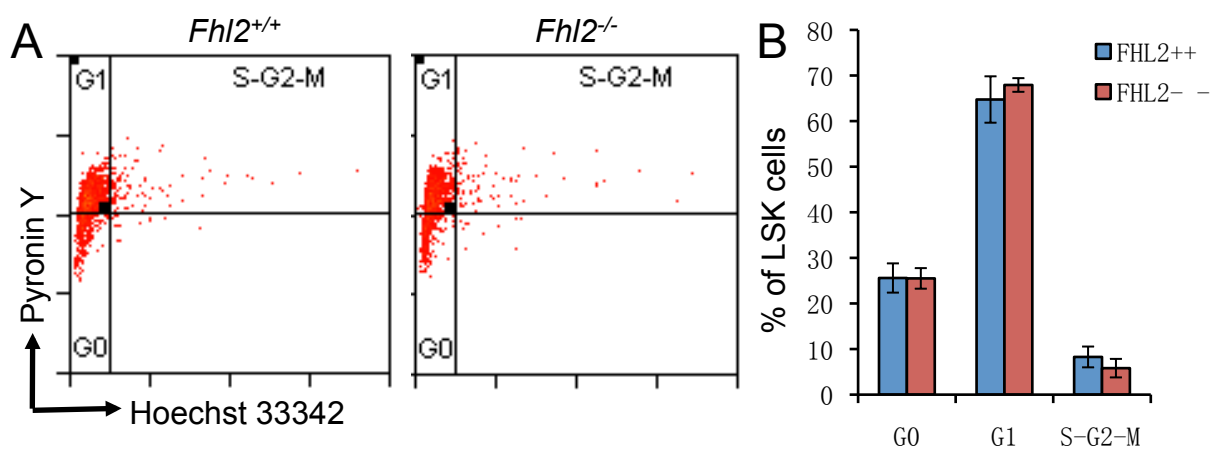

**Supplementary Figure 4. Analysis of quiescent cells (G0) in stem cell enriched LSKs.** (A) Representative flow cytometric analysis of LSKs stained with Hoechst 33342 and Pyronin staining . (B) The histogram shows the distribution of LSKs in G0, G1 and S-G2-M phase. The cells were isolated from *Fhl2*<sup>-/-</sup> and *Fhl2*<sup>+/+</sup> mice at age of 2-3 months (n=6).

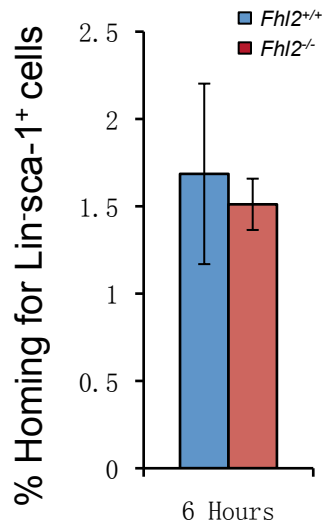

**Supplementary Figure 5. Homing ability of Lin-Sca-1<sup>+</sup> hematopoietic progenitor cells from *FHL2*<sup>+/+</sup> and *FHL2*<sup>-/-</sup> mice.** Histograms showing the percentage of the recovered CFSE<sup>+</sup> Lin-Sca-1<sup>+</sup> in the BM 6 hours after transplantation. The results are calculated based on the formula described in methods (mean ± SD; *n* = 5).

A

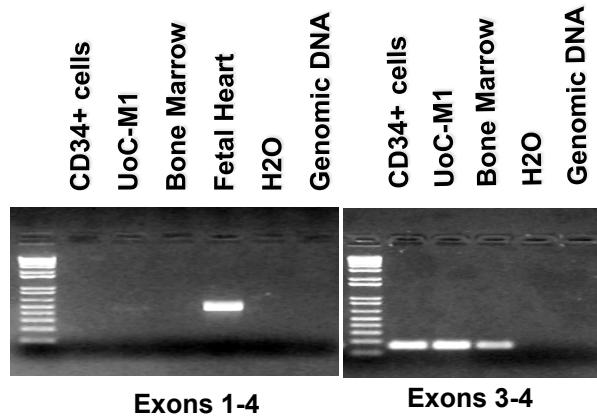

B

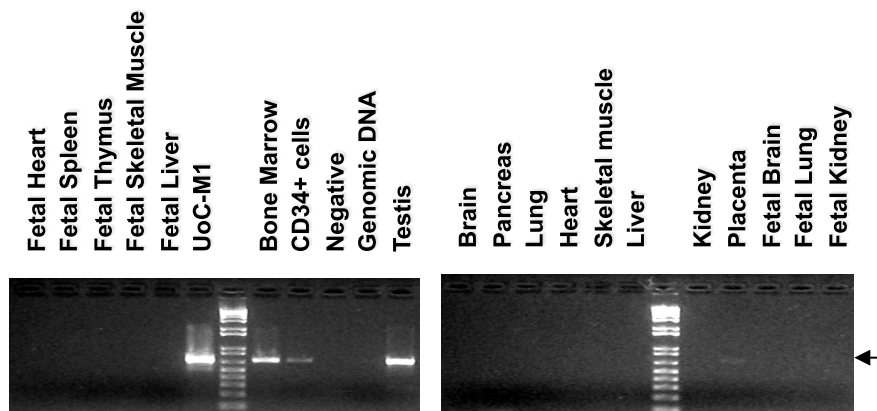

**Supplementary Figure 6.** Tissue distribution of *B-FHL2* expression. (A) Amplification of exons 1-4, and exons 3-4 of *FHL2* transcript from cDNA from human bone marrow cells, CD34+ cells, fetal heart cells, and the UoC-M1 cell line. The results indicate that exons 1-4 of *FHL2* can be amplified only from fetal heart cells, and weakly from UoC-M1, but not from human bone marrow and CD34+ cells, whereas exons 3-4 of *FHL2* can be amplified from bone marrow, CD34+ cells, and the UoC-M1 cells. (B) Amplification of exons 1-4 of *B-FHL2* transcript (arrow) from a multiple human tissue cDNA panel (BD Biosciences), and cDNAs from CD34+ hematopoietic progenitor cells, and the UoC-M1 cell line (UoC-M1 is a cell line established from the malignant cells of a patient with AML *de novo* characterized by a del(5q)).

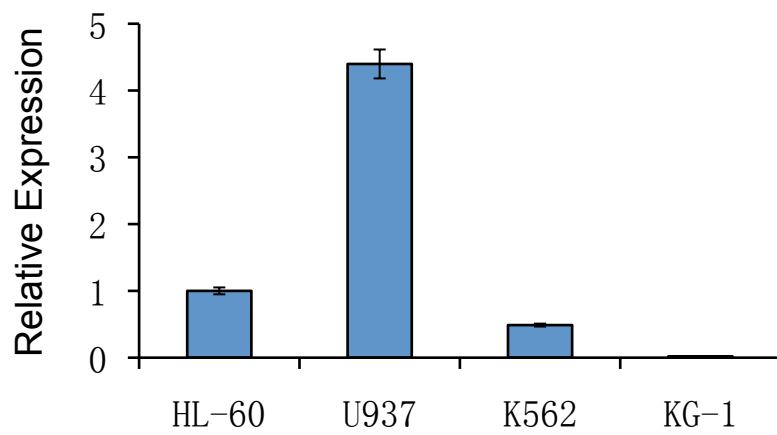

**Supplementary Figure 7. qRT-PCR analysis of *FHL2* expression in human leukemia cell lines.  $\beta$ -actin gene was used for sample normalization.**
